# Supplementary material for: Waste polyethylene terephthalate (PET) materials as sustainable precursors for the synthesis of nanoporous MOFs, MIL-47, MIL-53(Cr, Al, Ga) and MIL-101(Cr)
Source: Royal Society of Chemistry journal article supplement (doi:10.1039/c6dt01282e), 2016-01-01
Supplement: c6dt01282e1.pdf [file c6dt01282e1.pdf]

## Supporting Information for

# Waste Polyethylene Terephthalate (PET) Material as Sustainable Precursor for the Synthesis of Nanoporous MOFs, MIL-47, MIL-53(Cr, Al, Ga) and MIL-101(Cr)<sup>†</sup>

Sheng-Han Lo,<sup>a</sup> Duraisamy Senthil Raja,<sup>a</sup> Chia-Wei Chen,<sup>a</sup> Yu-Hao Kang,<sup>b</sup> Jiun-Jen Chen<sup>\*b</sup> and Chia-Her Lin<sup>\*ac</sup>

<sup>a</sup>Department of Chemistry, Chung Yuan Christian University, Taoyuan 320, Taiwan.

<sup>b</sup>Green Energy & Environment Research Laboratories, Industrial Technology Research Institute, Hsinchu 310, Taiwan.

<sup>c</sup>R&D Center for Membrane Technology, Chung Yuan Christian University, Taoyuan 320, Taiwan.

Corresponding Author

\*Tel: (+886) 03-5917468. E-mail: JiunJenChen@itri.org.tw (J. J. Chen)

\*Tel: (+886) 03-2653315. E-mail: chiaher@cycu.edu.tw (C. H. Lin)

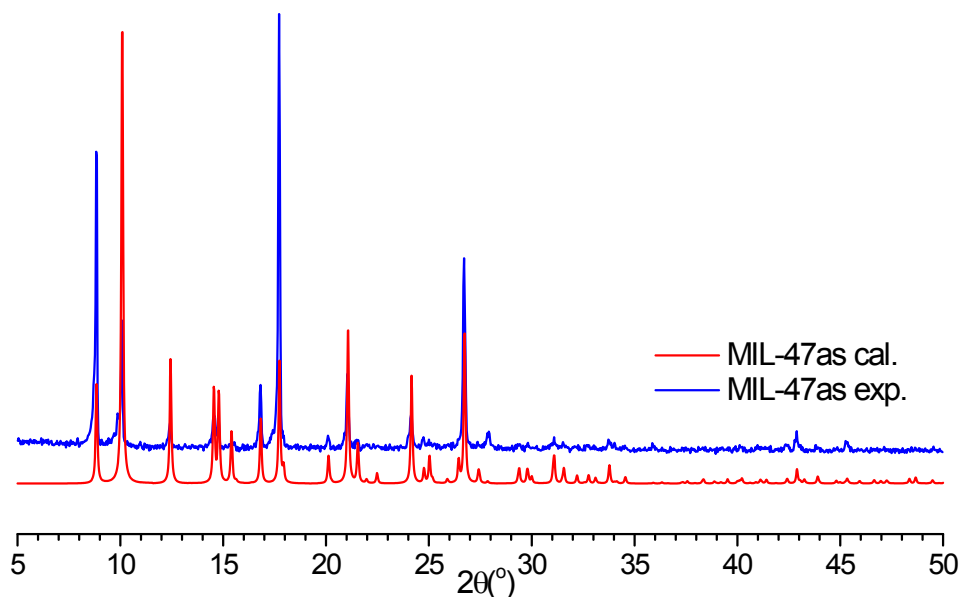

**Figure S1.** Comparison of PXRD pattern of the solid product obtained in the hydrothermal reaction of  $\text{VCl}_3$  (1 mmol) with PET (0.25 mmol), HF (2.0 mmol) and  $\text{H}_2\text{O}$  (4.5 mL) at 200 °C for 4 d for the synthesis of MIL-47 (as-synthesized), with its calculated PXRD pattern.

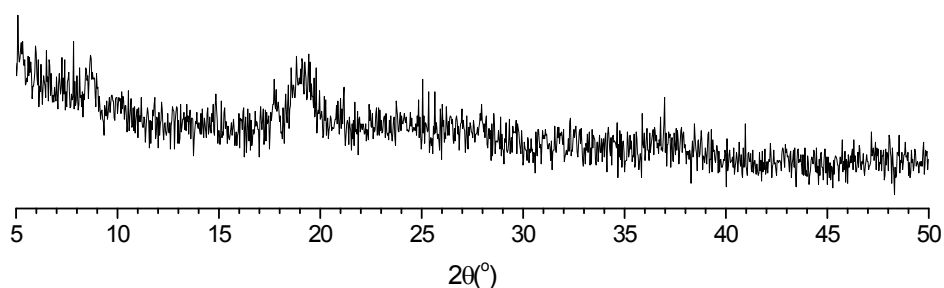

**Figure S2.** The PXRD pattern of the solid obtained in the hydrothermal reaction of  $\text{Cr}(\text{NO}_3)_3 \cdot 9\text{H}_2\text{O}$  (1 mmol) with PET (1 mmol), HF (1 mmol), and  $\text{H}_2\text{O}$  (4.8 mL) at 220 °C for 72 h for the synthesis of MIL-53(Cr).

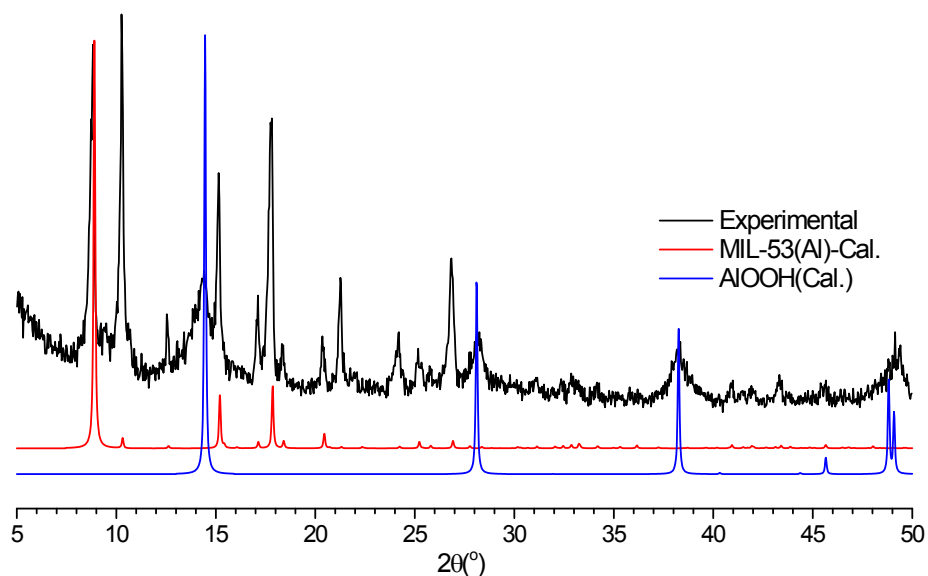

**Figure S3.** Comparison of PXRD pattern of the solid product obtained in the hydrothermal reaction of  $\text{Al}(\text{NO}_3)_3 \cdot 9\text{H}_2\text{O}$  (1 mmol) with PET (0.5 mmol), and  $\text{H}_2\text{O}$  (3.0 mL) at 220 °C for 72 h for the synthesis of MIL-53(Al), with calculated PXRD patterns of AlOOH and MIL-53(Al).

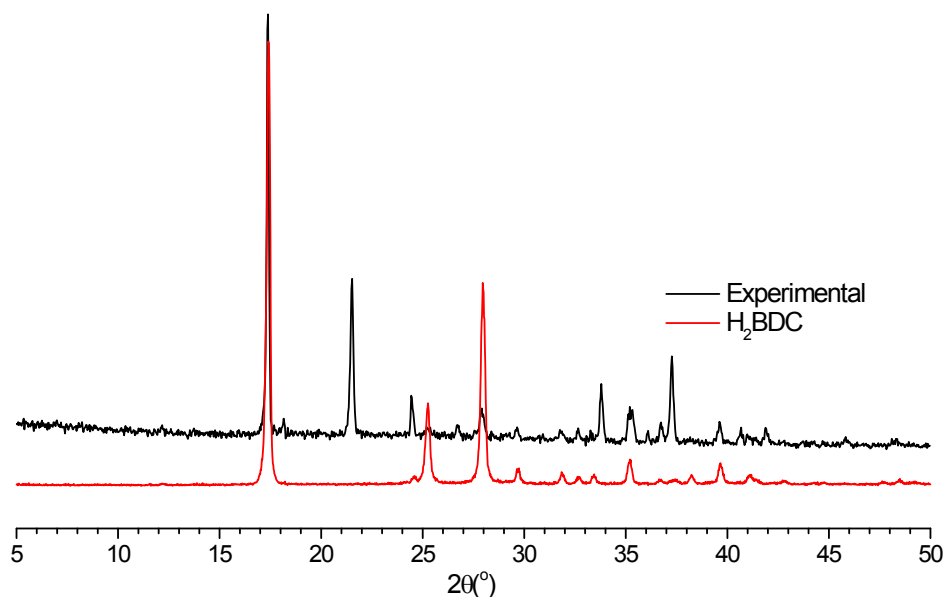

**Figure S4.** Comparison of PXRD pattern of the solid product obtained in the hydrothermal reaction of  $\text{Ga}(\text{NO}_3)_3 \cdot x\text{H}_2\text{O}$  (1 mmol) with PET (1 mmol), HF (1.2 mmol) and  $\text{H}_2\text{O}$  (5.0 mL) at 210 °C for 5 h for the synthesis of MIL-53(Ga), with PXRD patterns of H<sub>2</sub>BDC.

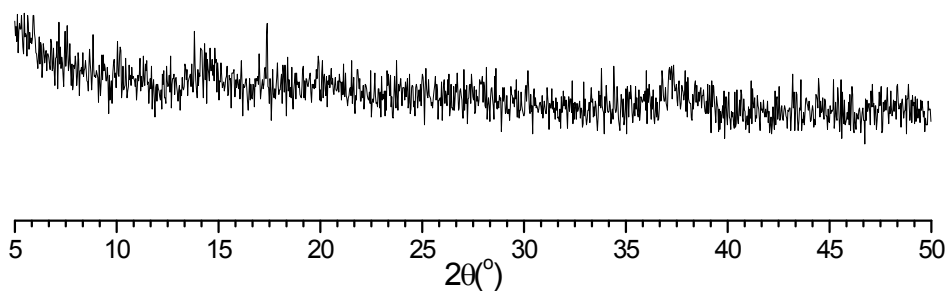

**Figure S5.** The PXR D pattern of the solid obtained in the hydrothermal reaction of  $\text{Cr}(\text{NO}_3)_3 \cdot 9\text{H}_2\text{O}$  (1 mmol) with PET (1 mmol), HF (1 mmol), and  $\text{H}_2\text{O}$  (4.8 mL) at 220 °C for 8 h for the synthesis of MIL-101(Cr).

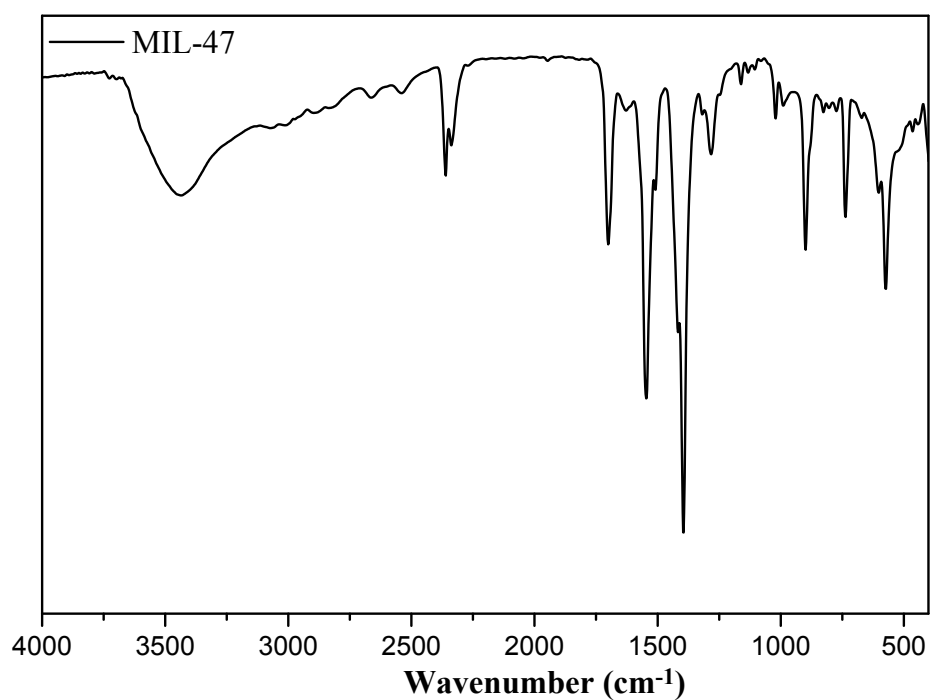

**Figure S6.** The FT-IR spectrum of activated sample of MIL-47 synthesized using PET as the source of  $\text{H}_2\text{BDC}$ .

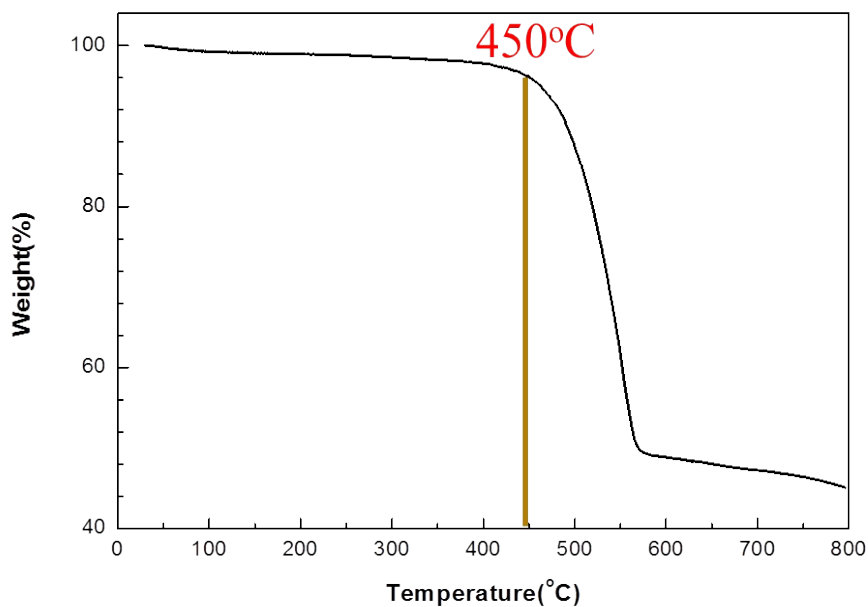

**Figure S7.** The TGA curve of activated sample of MIL-47 synthesized using PET as the source of H<sub>2</sub>BDC.

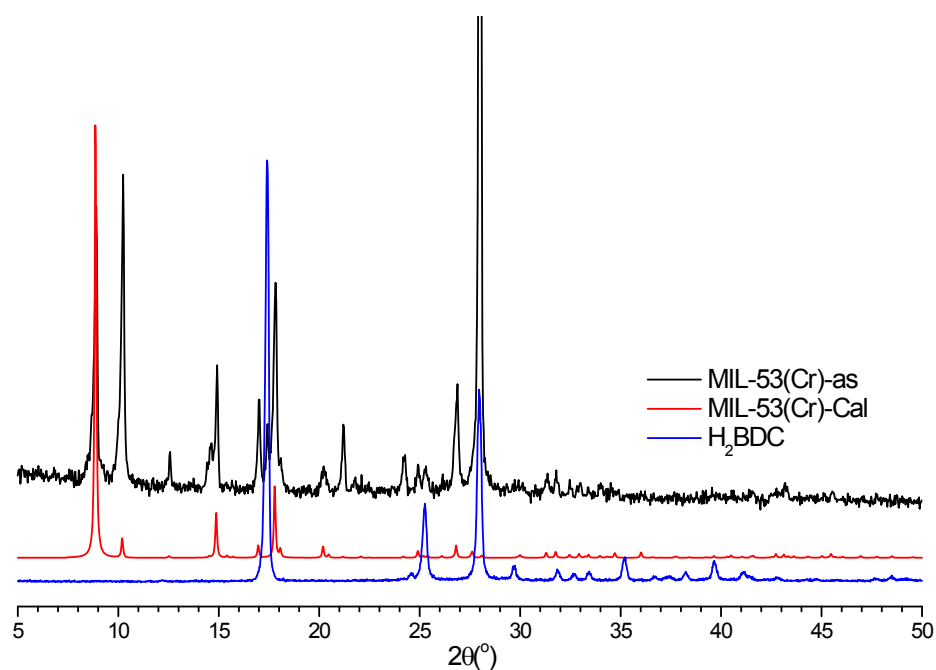

**Figure S8.** Comparison of PXRD pattern of the product obtained in the hydrothermal reaction of CrCl<sub>3</sub>·6H<sub>2</sub>O (1 mmol) with PET (1 mmol), HF (2 mmol), and H<sub>2</sub>O (5 mL) at 160 °C for 72 h for the synthesis of MIL-53(Cr) with calculated PXRD pattern of MIL-53(Cr) and PXRD pattern of H<sub>2</sub>BDC.

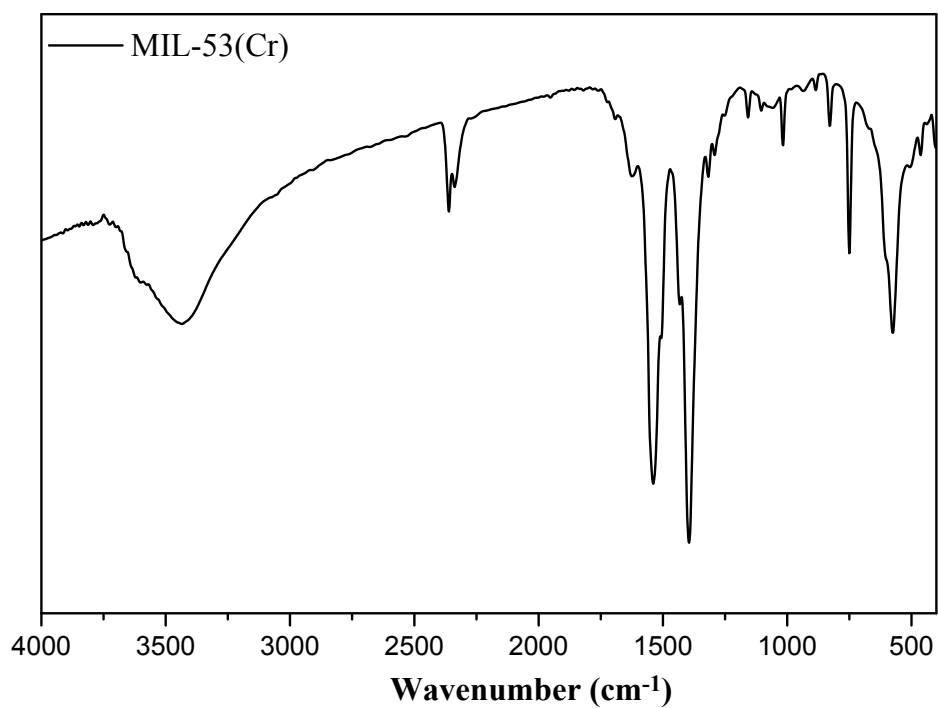

**Figure S9.** The FT-IR spectrum of MIL-53(Cr) synthesized using PET as the source of H<sub>2</sub>BDC.

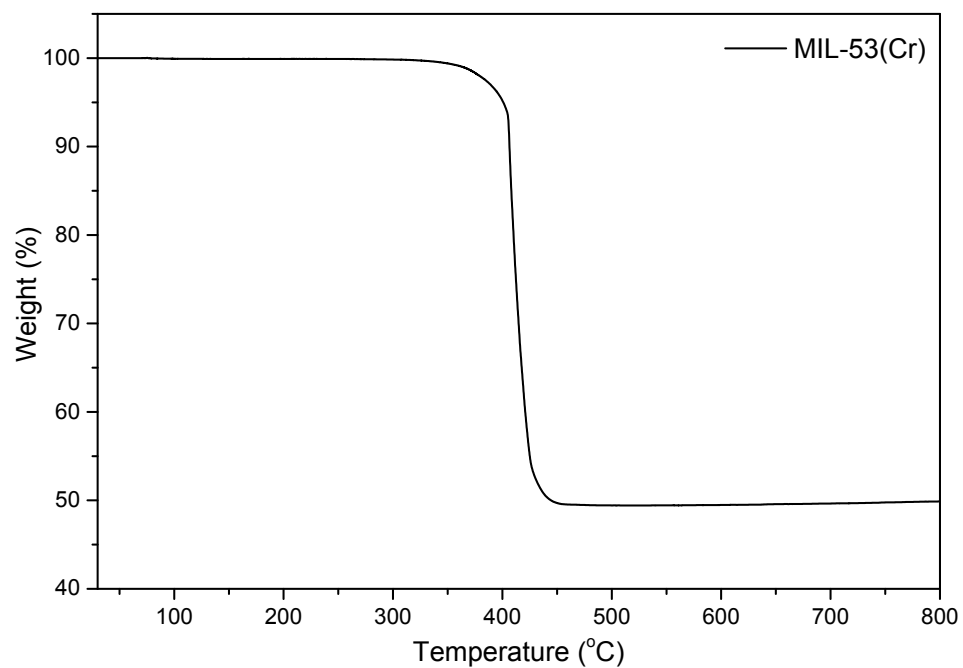

**Figure S10.** The TGA curve of activated sample of MIL-53(Cr) synthesized using PET as the source of H<sub>2</sub>BDC.

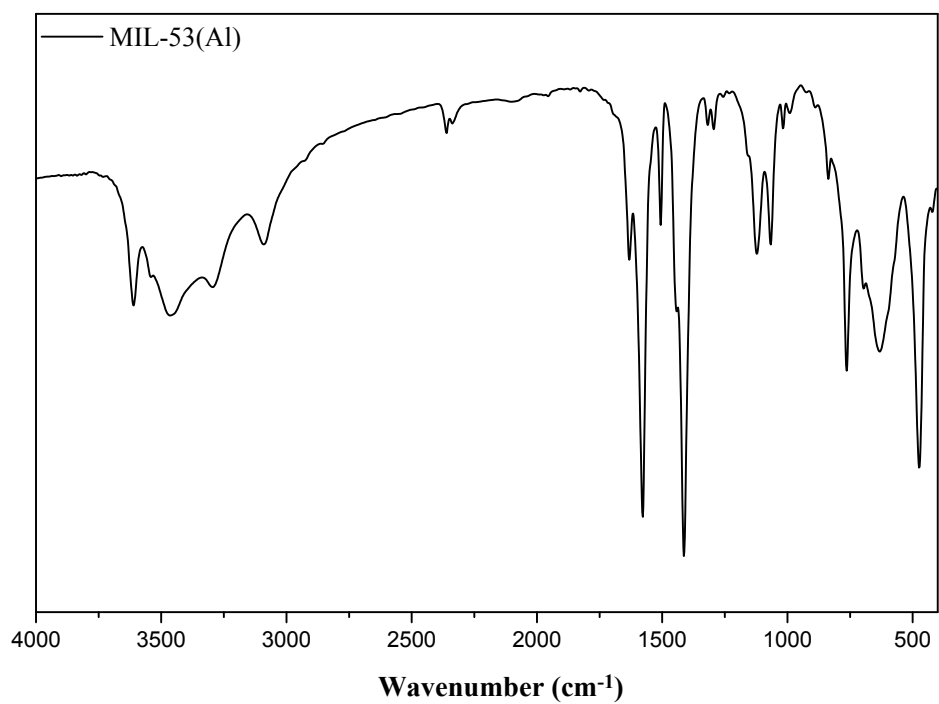

**Figure S11.** The FT-IR spectrum of MIL-53(Al) synthesized using PET as the source of H<sub>2</sub>BDC.

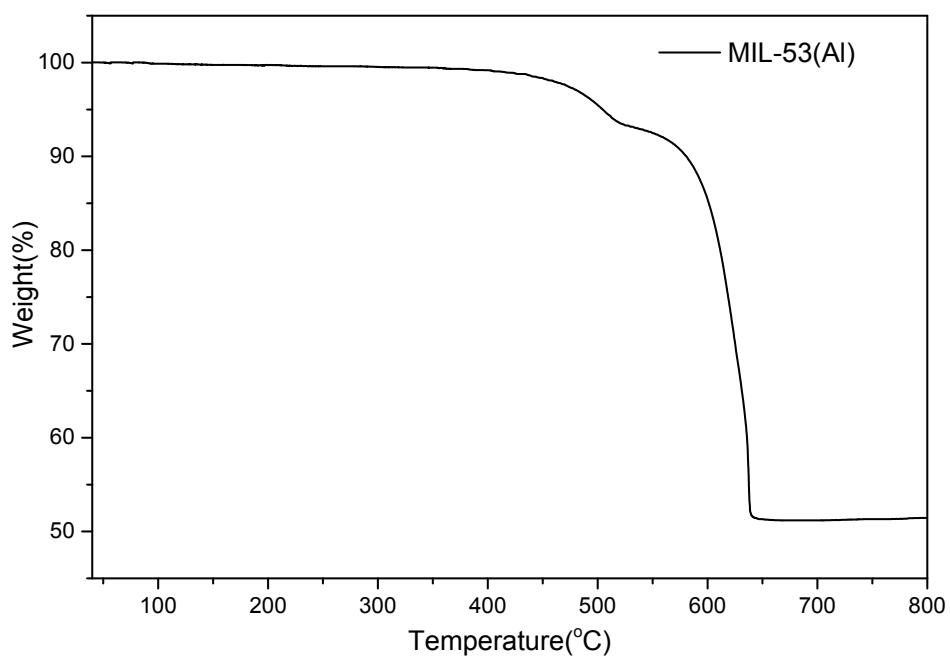

**Figure S12.** The TGA curve of activated sample of MIL-53(Al) synthesized using PET as the source of H<sub>2</sub>BDC.

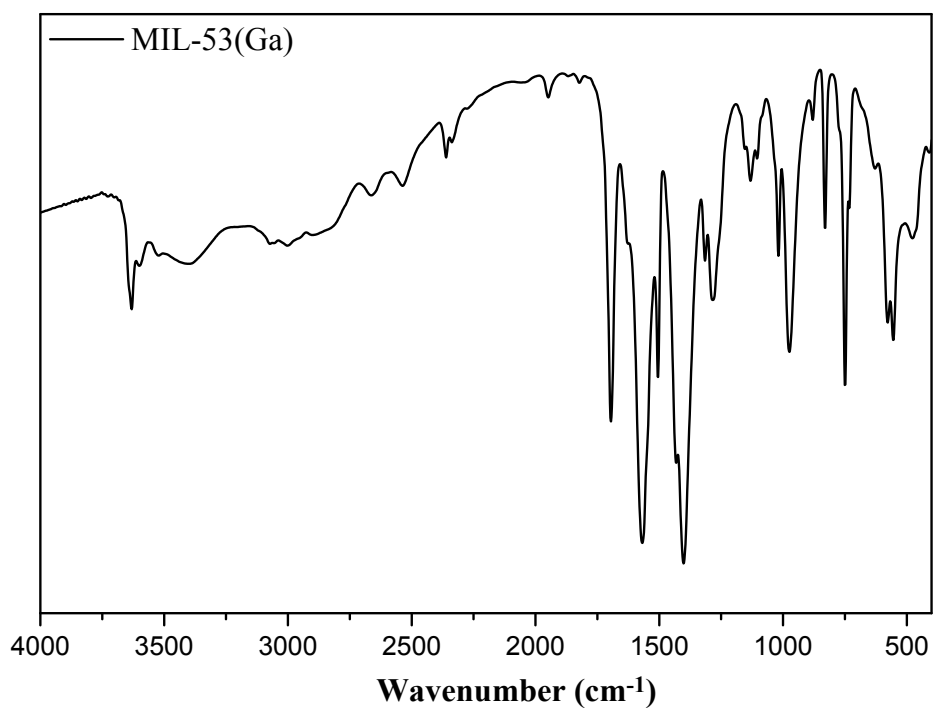

**Figure S13.** The FT-IR spectrum of MIL-53(Ga) synthesized using PET as the source of H<sub>2</sub>BDC.

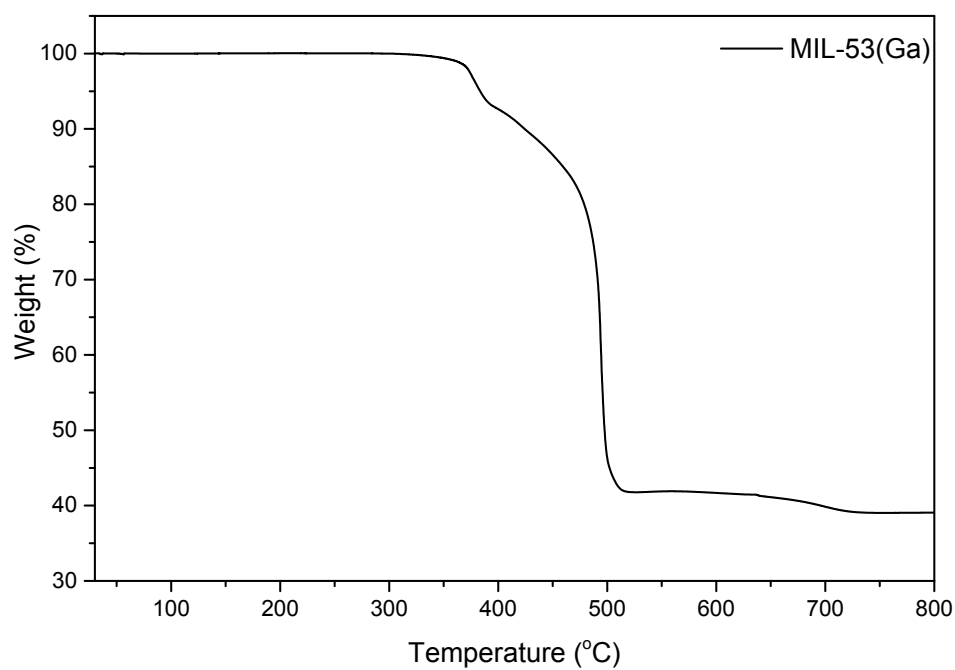

**Figure S14.** The TGA curve of activated sample of MIL-53(Ga) synthesized using PET as the source of H<sub>2</sub>BDC.



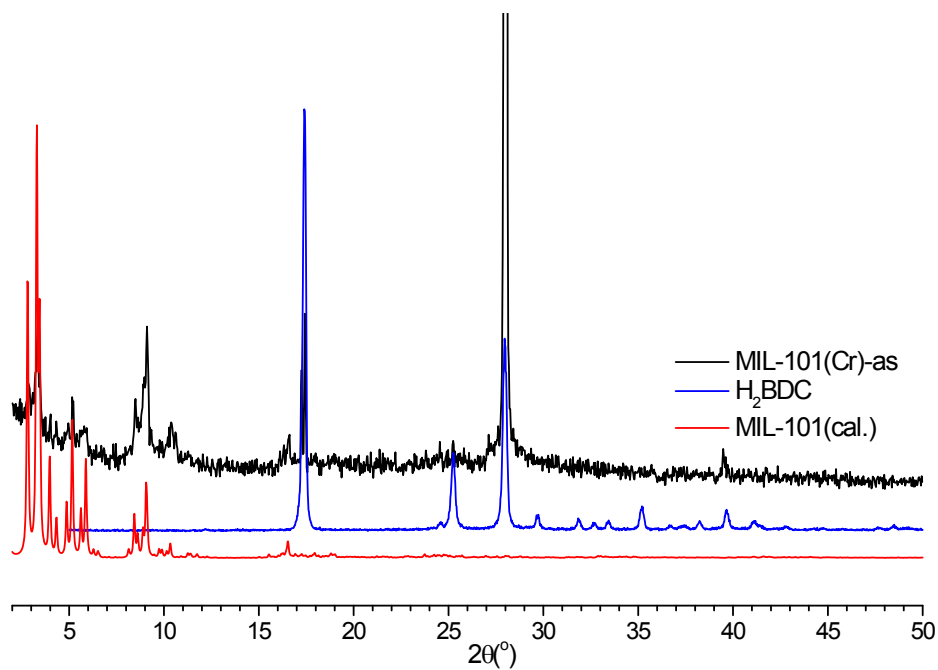

**Figure S15.** Comparison of PXRD pattern of the product obtained in the hydrothermal reaction of  $\text{CrCl}_3 \cdot 6\text{H}_2\text{O}$  (1 mmol) with PET (1 mmol), HF (1 mmol), and  $\text{H}_2\text{O}$  (5 mL) at  $220^\circ\text{C}$  for 8 h for the synthesis of MIL-101(Cr) with calculated PXRD pattern of MIL-101 and PXRD pattern of  $\text{H}_2\text{BDC}$ .

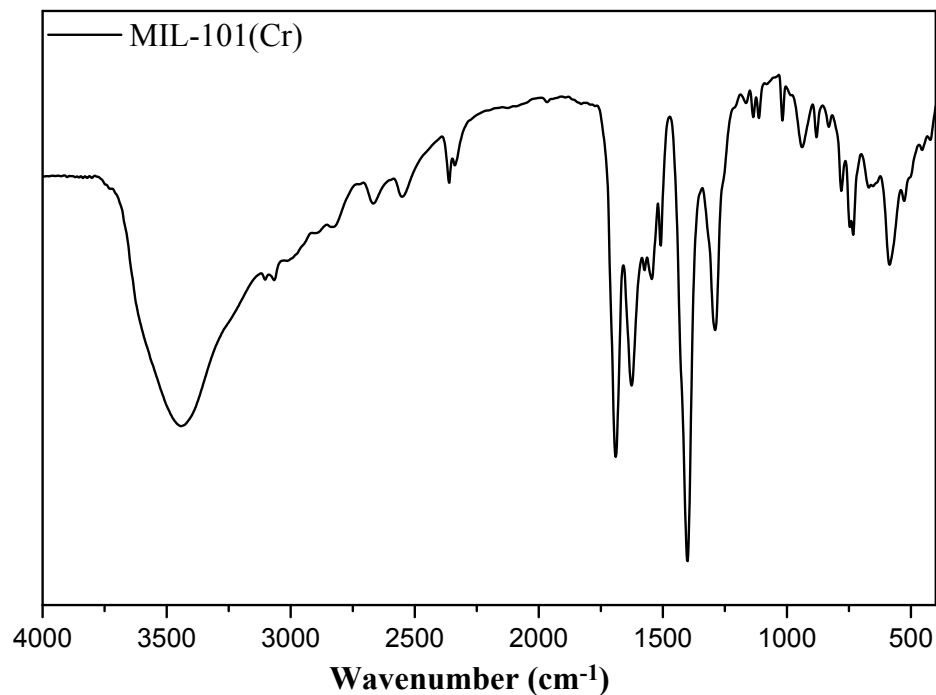

**Figure S16.** The FT-IR spectrum of MIL-101(Cr) synthesized using PET as the source of  $\text{H}_2\text{BDC}$ .

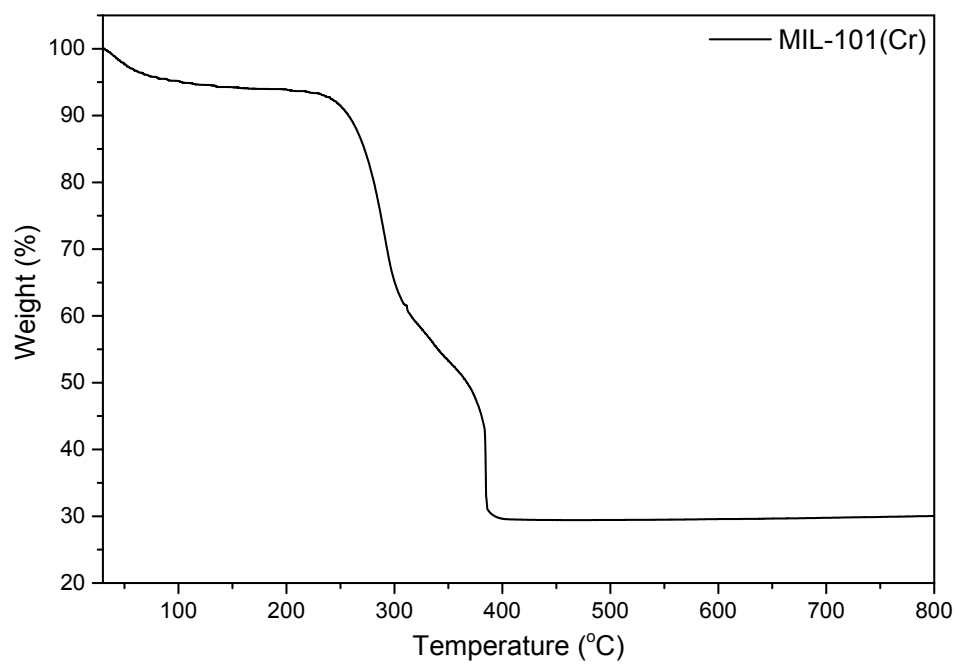

**Figure S17.** The TGA curve of activated sample of MIL-101(Cr) synthesized using PET as the source of H<sub>2</sub>BDC.

**Table S1.** Coupling of propylene oxide (PO) and CO<sub>2</sub> to propylene carbonate (PC) catalyzed by various MOF/*n*-Bu<sub>4</sub>NBr catalytic systems.

| Entry | MOF                    | <i>n</i> -Bu <sub>4</sub> NBr | Reaction Condition                                  | Yield (%) | Ref. |
|-------|------------------------|-------------------------------|-----------------------------------------------------|-----------|------|
| 1     | MOF-5: 0.1 g           | 2.5 mol%                      | PO: 20 mmol, 6 MPa CO <sub>2</sub> , 50 °C, 4 h     | 97.6      | 66   |
| 2     | Cu(tactmb): 0.125 mol% | 0.58 g                        | PO: 25 mmol, 1 atm CO <sub>2</sub> , 25 °C, 48 h    | 47.5      | 67   |
| 3     | HKUST-1: 0.125 mol%    | 0.58 g                        | PO: 25 mmol, 1 atm CO <sub>2</sub> , 25 °C, 48 h    | 49.2      | 67   |
| 4     | MOF-505: 0.125 mol%    | 0.58 g                        | PO: 25 mmol, 1 atm CO <sub>2</sub> , 25 °C, 48 h    | 48.0      | 67   |
| 5     | MMCF-2: 0.125 mol%     | 0.58 g                        | PO: 25 mmol, 1 atm CO <sub>2</sub> , 25 °C, 48 h    | 95.4      | 67   |
| 6     | MMPF-9: 0.03125 mmol   | 0.58 g                        | PO: 25 mmol, 1 atm CO <sub>2</sub> , 25 °C, 48 h    | 87.4      | 68   |
| 7     | HKUST-1: 0.0313 mmol   | 0.58 g                        | PO: 25 mmol, 1 atm CO <sub>2</sub> , 25 °C, 48 h    | 49.2      | 68   |
| 8     | ZnGlu: 1.6 mol%        | 1.6 mol%                      | PO: 42.6 mmol, 1 MPa CO <sub>2</sub> , 25 °C, 24 h  | 92        | 69   |
| 9     | Ni(saldpen)-MOF: 0.1 g | 2 mol%                        | PO: 15 mmol, 2 MPa CO <sub>2</sub> , 80 °C, 4 h     | 86        | 70   |
| 10    | In-MOF: 0.056 mmol     | 0.5 mmol                      | PO: 20 mmol, 2 MPa CO <sub>2</sub> , 80 °C, 4 h     | 93.4      | 71   |
| 11    | HKUST-1: 0.2 mol%      | 10 mol%                       | PO: 20 mmol, 1 atm CO <sub>2</sub> , 25 °C, 48 h    | 65        | 72   |
| 12    | MOF1: 0.2 mol%         | 10 mol%                       | PO: 20 mmol, 1 atm CO <sub>2</sub> , 25 °C, 48 h    | 96        | 72   |
| 13    | ZnGlu: 0.47 mol%       | 0.94 mol%                     | PO: 42.6 mmol, 1.2 MPa CO <sub>2</sub> , 25 °C, 6 h | 99        | 73   |
| 14    | MIL-101(Cr): 0.2 mmol  | 0.3 mmol                      | PO: 18 mmol, 8 bar CO <sub>2</sub> , 25 °C, 48 h    | 82        | 74   |
| 15    | MIL-101(Fe): 0.2 mmol  | 0.3 mmol                      | PO: 18 mmol, 8 bar CO <sub>2</sub> , 25 °C, 48 h    | 95        | 74   |
| 16    | MOF-5: 0.2 mmol        | 0.3 mmol                      | PO: 18 mmol, 8 bar CO <sub>2</sub> , 25 °C, 48 h    | 67        | 74   |
| 17    | MIL-47: 0.1 g          | 2.5 mol%                      | PO: 5 mL, 2 MPa CO <sub>2</sub> , 50 °C, 24 h       | 95        | +    |

+: Present Work

**Table S2.** Coupling of cyclohexene oxide (CHO) and CO<sub>2</sub> to cyclohexene carbonate (CHC) catalyzed by various MOF/*n*-Bu<sub>4</sub>NBr catalytic systems.

| Entry | MOF                                   | <i>n</i> -Bu <sub>4</sub> NBr | Reaction Condition                                       | Yield (%) | Ref. |
|-------|---------------------------------------|-------------------------------|----------------------------------------------------------|-----------|------|
| 1     | UMCM-1-NH <sub>2</sub> :<br>0.64 mol% | 0.64 mol%                     | CHO: 42.8 mmol, 1.2 MPa CO <sub>2</sub> ,<br>25 °C, 24 h | 10        | 75   |
| 2     | IL-ZIF-90: 0.49<br>mol%               | -                             | CHO: 18.1 mmol, 1 MPa CO <sub>2</sub> ,<br>120 °C, 3 h   | 9         | 76   |
| 3     | MIL-101(Cr):<br>50 mg                 | 0.62 mmol                     | CHO: 18 mmol, 8 atm CO <sub>2</sub> , 25<br>°C, 64 h     | 5         | 77   |
| 4     | MIL-101(Cr):<br>0.1 g                 | 5.0 mol%                      | CHO: 5 mL, 2 MPa CO <sub>2</sub> , 80 °C,<br>24 h        | 53        | +    |
| 5     | MIL-101(Cr):<br>0.1 g                 | 5.0 mol%                      | CHO: 5 mL, 2 MPa CO <sub>2</sub> , 80 °C,<br>48 h        | 74        | +    |
| 6     | MIL-101(Cr):<br>0.1 g                 | 5.0 mol%                      | CHO: 5 mL, 2 MPa CO <sub>2</sub> , 80 °C,<br>72 h        | 92        | +    |

+: Present Work
